# Supplementary material
Source: HighWire-hosted journal article supplement (https://diabetes.diabetesjournals.org/content/suppl/2009/01/14/db08-1193)

**Supplementary Table 1**

| <b>Timing of BG (mmol/L)</b>           | <b>Placebo (n=18)</b> | <b>Metformin (n=18)</b> | <b>Liraglutide (n=18)</b> |
|----------------------------------------|-----------------------|-------------------------|---------------------------|
| Baseline before HFD                    | 6.7 ± 0.3             | 5.6 ± 0.18              | 6.2 ± 0.67                |
| 1 mo after HFD and before STZ exposure | 7.17 ± 0.27           | 7.41 ± 0.35             | 7.98 ± 0.36               |
| After STZ and before drug treatment    | 18.25 ± 0.9           | 18.88 ± 1.054           | 19.64 ± 1.1               |
| 1 wk after drug treatment              | 21.3 ± 0.8            | 8.57 ± 0.67             | 7.85 ± 0.56               |
| 1 mo after LAD ligation                | 23.55 ± 0.9           | 25.5 ± 1.3              | 21.66 ± 2.06              |

Random tail blood glucose (BG) levels in mice employed for generating the high fat diet (HFD)- and streptozotocin (STZ)- model of diabetes. Data are expressed as mean ± SE. No significant differences were observed in liraglutide vs. metformin-treated groups at any time-points. Although body weight did not change in MET-treated animals (d0: 27.3±0.5 vs. d7: 27.5 ± 0.4, g, P=0.72), LIR 75-treated diabetic mice experienced modest weight loss (d0: 26.7 ± 0.5 vs. d7: 24.9 ± 0.7, g, P=0.04).

# Experimental design

# Supplementary Figure 1

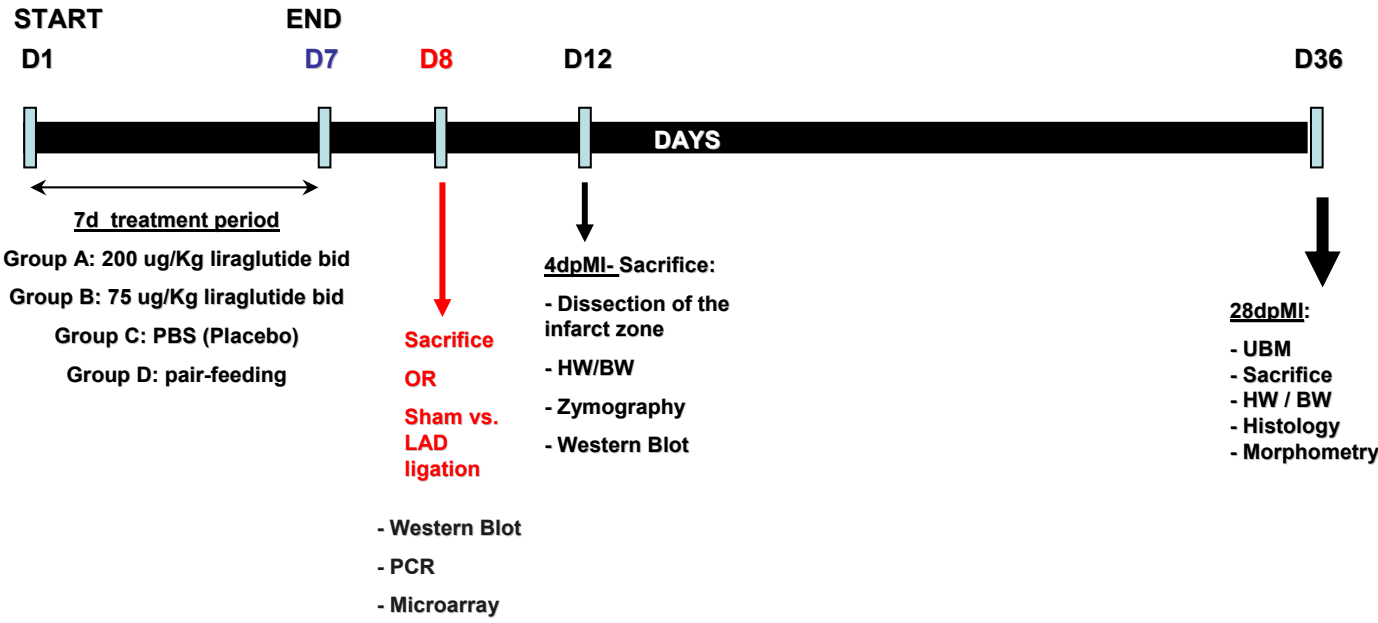

Supplement: db08-11931.suppl.pdf [file db08-11931.suppl.pdf]
